# Supplementary material
Source: publisher figshare collection journal article supplement (https://karger.figshare.com/ndownloader/files/19142210)

**Listing of Supplemental Material(s):**

**Supplemental Figure 1** Overall survival (OS) and (B) breast cancer–specific survival (BCSS) of primary metastatic breast cancer patients between the surgery treatment group and nonsurgery treatment group.

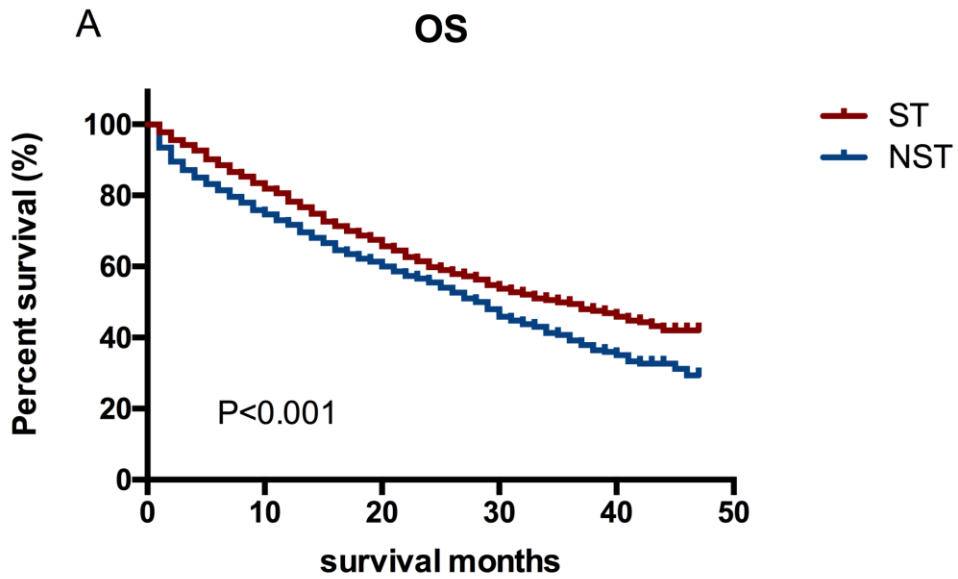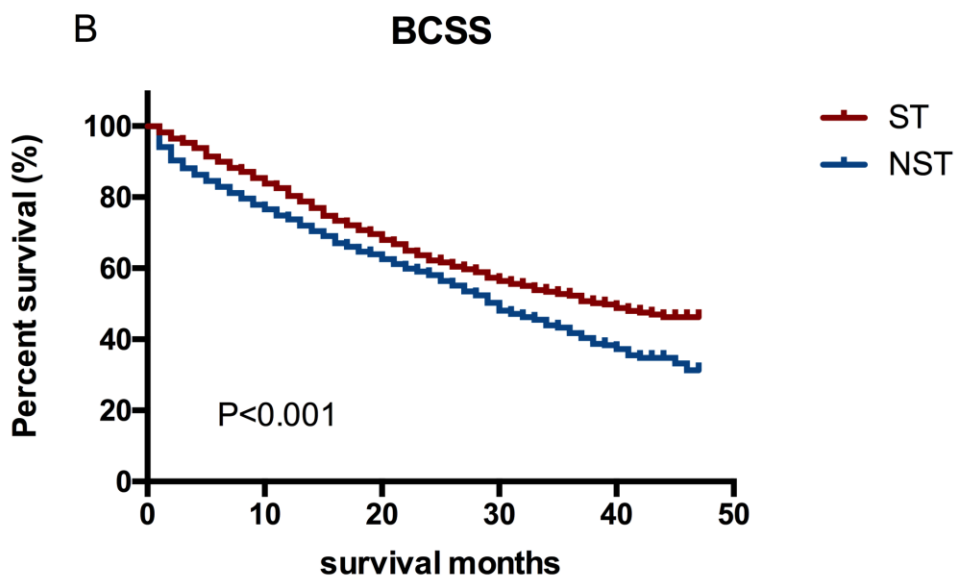

**Supplemental Figure 2** Breast cancer-specific survival (BCSS) of primary metastatic breast cancer patients with 1 metastatic site (bone only, brain only, liver only, or lung only) between the surgery treatment (ST) and nonsurgery treatment (NST) groups

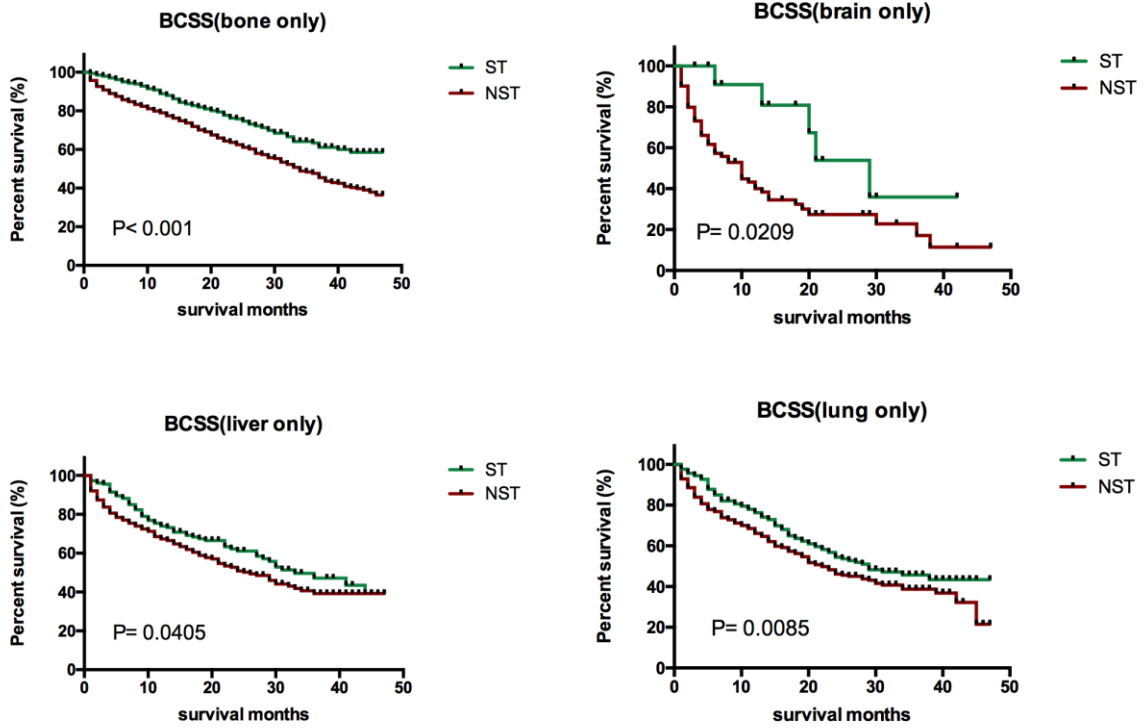

Supplement: Supplementary file 1 [file 19142210]
